# Supplementary material
Source: Springer Nature journal article supplement (https://www.springermedizin.de/resource/supplementary/13054_2013_2177_MOESM7_ESM.pdf/9712610)
Supplement: MOESM7 [file 9712610]

**918** patients with severe sepsis

**179** excluded patients with incomplete data of vasoactive treatment or hemodynamic measurements

**739** patients

**108** patients with severe sepsis diagnosed > 24 hours after ICU admission excluded

**631** patients

**208** patients excluded

- 70 patients died during the first 5 days of ICU admission
- 138 patients had progression of AKI within 12 hours after ICU admission

**423** patients with severe sepsis included in the study

**153 (36.2%)** patients with progression of AKI

**270 (63.8%)** patients without progression of AKI
